# Supplementary material for: A New Coarse-Grained Model for E. coli Cytoplasm: Accurate Calculation of the Diffusion Coefficient of Proteins and Observation of Anomalous Diffusion
Source: PubMed Central journal article supplement (PMC4152264; doi:10.1371/journal.pone.0106466), 2014-09-02

**Figure S1(a):** Probability distribution function for the displacement of GFP in 10 ns. The green curve in the figure shows the Gaussian fit of the probability distribution function.

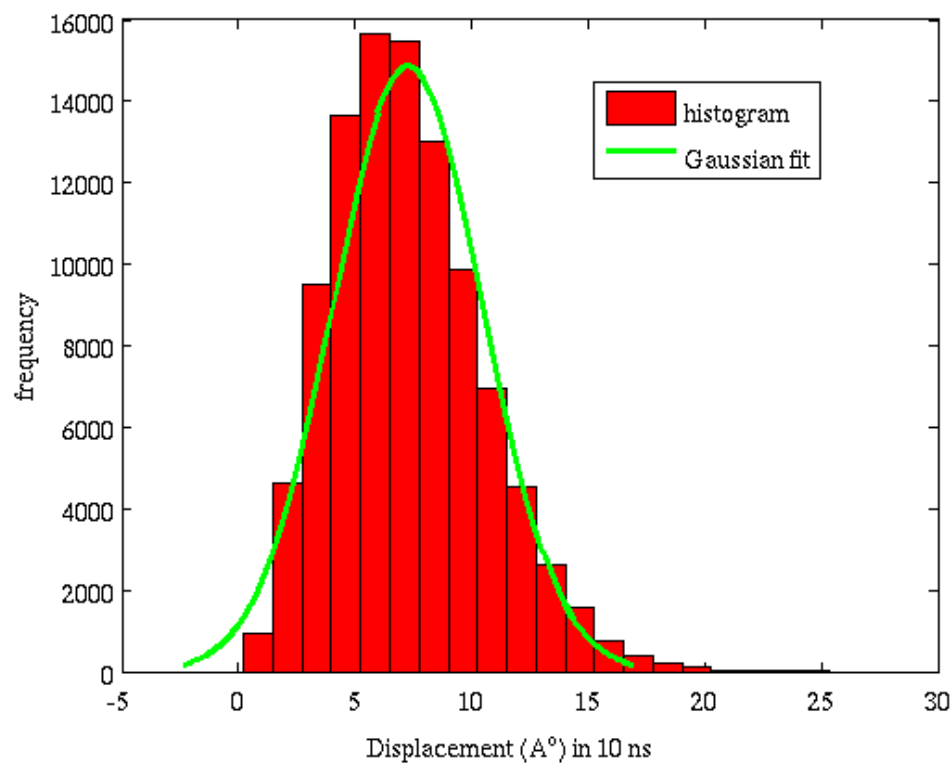

**Figure S1(b):** Probability distribution function for the displacement of GFP in 100 ns. The green curve in the figure shows the Gaussian fit of the probability distribution function.

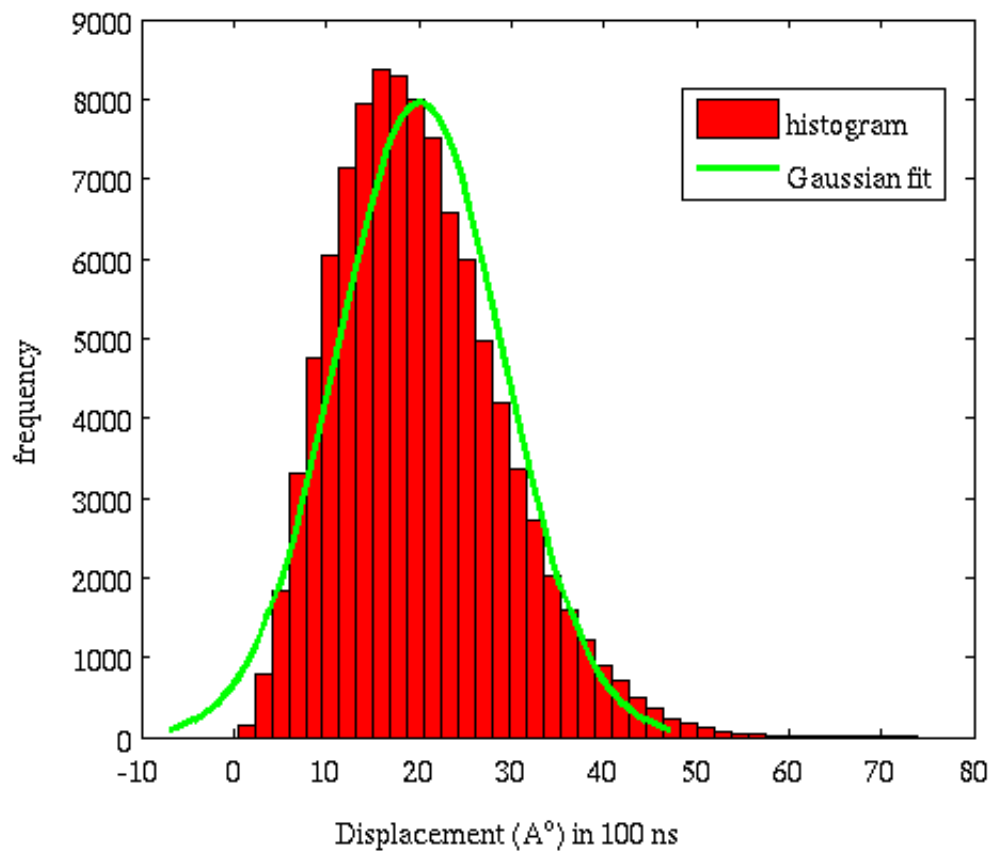

Supplement: pone.0106466.s001.pdf [file pone.0106466.s001.pdf]
